# Supplementary material
Source: HighWire-hosted journal article supplement (https://erj.ersjournals.com/content/52/4/1800678)
Supplement: inline-supplementary-material-1 [file inline-supplementary-material-1.pdf]

## **Online Supplemental Material**

### **Haemodynamics and risk assessment in systemic-sclerosis associated pulmonary arterial hypertension**

Jason Weatherald, Athénaïs Boucly, David Launay, Vincent Cottin, Grégoire Prévôt,  
Delphine Bourlier, Claire Dauphin, Ari Chaouat, Laurent Savale, Xavier Jaïs, Mitja  
Jevnikar, Julie Traclet, Pascal De Groote, Gérald Simonneau, Eric Hachulla, Luc  
Mouthon, David Montani, Marc Humbert, Olivier Sitbon

#### Table of Contents

|                        |     |
|------------------------|-----|
| Supplemental Figure S1 | p.2 |
| Supplemental Figure S2 | p.3 |
| Supplemental Table S1  | p.4 |
| Supplemental Table S2  | p.5 |
| Supplemental Table S3  | p.6 |
| Supplemental Table S4  | p.7 |
| Supplemental Table S5  | p.8 |
| Supplemental Table S6  | p.9 |

Supplemental Figure S1 - Transplant-free survival

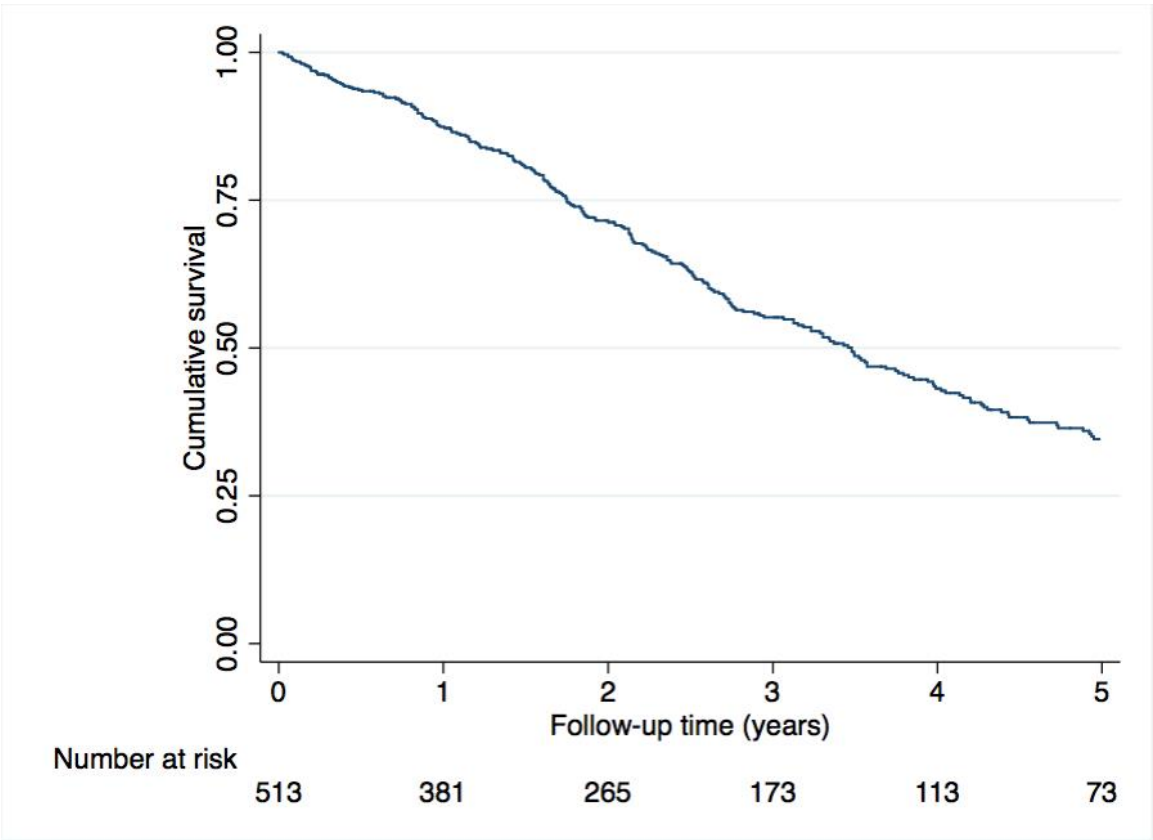

Supplemental Figure S2 - Transplant-free survival for patients with cardiac index  $\geq 2.5$  L/min/m<sup>2</sup> at first follow-up right heart catheterization according to stroke volume index (SVI).

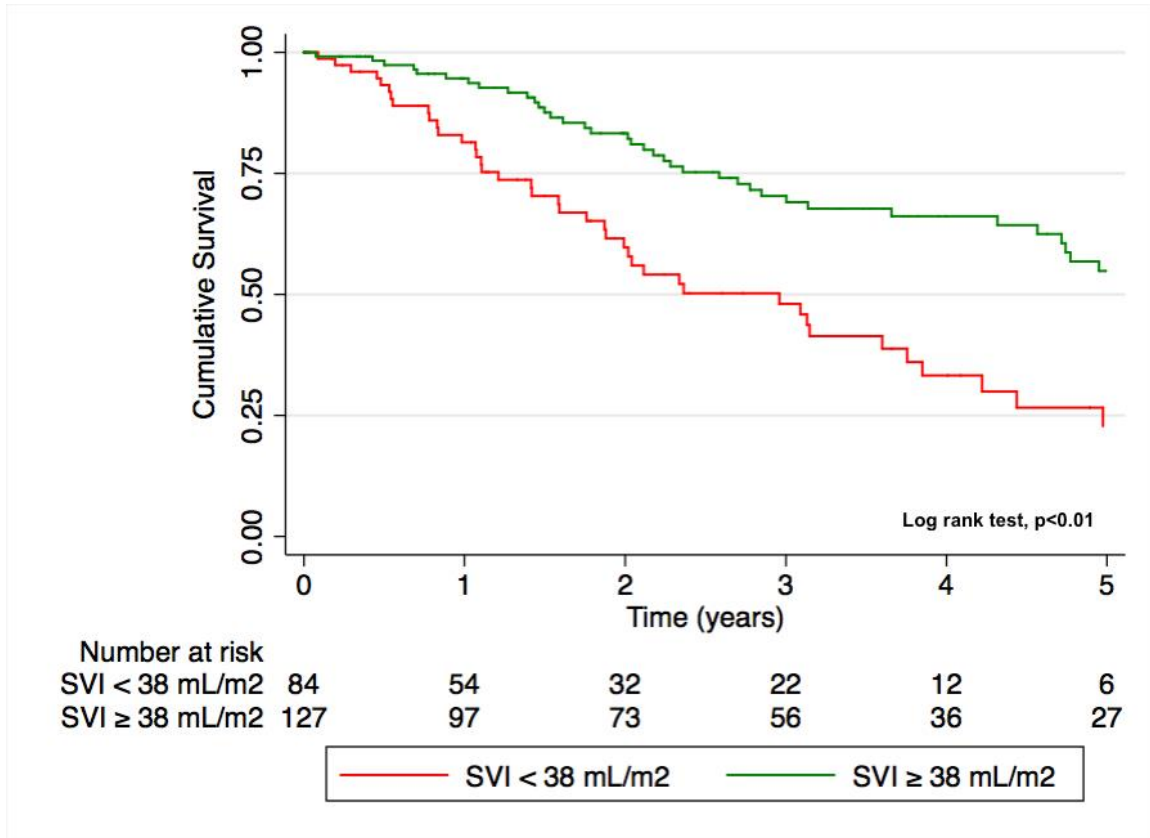

Supplemental Table S1 - Cox proportional-hazards regression for the association  
between number of low-risk criteria present at baseline and transplant-free survival

| Number of Low-Risk Criteria | Hazard Ratio | (95% CI)    | p     |
|-----------------------------|--------------|-------------|-------|
| 0                           | Reference    |             |       |
| 1                           | 0.81         | (0.59-1.13) | 0.22  |
| 2                           | 0.69         | (0.50-0.96) | 0.028 |
| 3                           | 0.51         | (0.32-0.82) | 0.006 |
| 4                           | 0.21         | (0.09-0.53) | 0.001 |
| Log-likelihood              | -1403.1419   |             |       |
| p                           | 0.0002       |             |       |

Supplemental Table S2 - Discrimination of 1-year transplant-free survival by number of low-risk criteria present at baseline.

| Low-risk criteria<br>Cutpoint | Sensitivity | Specificity | + Likelihood ratio | - Likelihood ratio |
|-------------------------------|-------------|-------------|--------------------|--------------------|
| >= 0                          | 1.0         | 0           | 1                  |                    |
| >= 1                          | 0.81        | 0.32        | 1.19               | 0.60               |
| >= 2                          | 0.47        | 0.73        | 1.78               | 0.72               |
| >= 3                          | 0.16        | 0.95        | 3.18               | 0.89               |
| >= 4                          | 0           | 1.0         |                    | 0.96               |

Area under the curve 0.63 (95%CI 0.56-0.69)

Supplemental Table S3 - Cox proportional-hazards regression for the association between number of low-risk criteria present at follow-up and transplant-free survival

| Number of Low-risk |              |             |        |
|--------------------|--------------|-------------|--------|
| Criteria           | Hazard Ratio | (95% CI)    | p      |
| 0                  | Reference    |             |        |
| 1                  | 0.57         | (0.38-0.87) | 0.009  |
| 2                  | 0.32         | (0.21-0.50) | <0.001 |
| 3                  | 0.26         | (0.16-0.43) | <0.001 |
| 4                  | 0.08         | (0.03-0.21) | <0.001 |
| Log-likelihood     | -865.678     |             |        |
| p                  | <0.001       |             |        |

Supplemental Table S4 - Univariable and multivariable Cox proportional-hazards regression for the association between low-risk criteria at follow-up and transplant-free survival

| Low-Risk Criteria                | Univariable  |             |        | Multivariable |             |       |
|----------------------------------|--------------|-------------|--------|---------------|-------------|-------|
|                                  | Hazard Ratio | (95% CI)    | p      | Hazard Ratio  | (95% CI)    | p     |
| NYHA I or II                     | 0.42         | (0.29-0.59) | <0.001 | 0.65          | (0.44-0.99) | 0.042 |
| 6MWD > 440 m                     | 0.38         | (0.21-0.68) | 0.001  | 0.53          | (0.28-0.98) | 0.043 |
| RAP < 8 mmHg                     | 0.51         | (0.37-0.70) | <0.001 | 0.66          | (0.46-0.97) | 0.03  |
| CI $\geq$ 2.5 L/m/m <sup>2</sup> | 0.46         | (0.33-0.63) | <0.001 | 0.51          | (0.35-0.75) | 0.001 |
| Log Likelihood                   | -560.369     |             |        |               |             |       |
| p                                | <0.001       |             |        |               |             |       |

Abbreviations: NYHA - New York Heart Association; 6MWD - 6-minute walking distance; RAP - right atrial pressure; CI - cardiac index

Supplemental Table S5 - Discrimination of subsequent 1-year transplant-free survival by number of low-risk criteria present at first follow-up right heart catheterization.

| Low-risk criteria<br>Cutpoint | Sensitivity | Specificity | + Likelihood ratio | - Likelihood ratio |
|-------------------------------|-------------|-------------|--------------------|--------------------|
| >= 0                          | 1.0         | 0           | 1                  |                    |
| >= 1                          | 0.87        | 0.29        | 1.23               | 0.45               |
| >= 2                          | 0.63        | 0.76        | 2.58               | 0.49               |
| >= 3                          | 0.31        | 0.93        | 4.29               | 0.74               |
| >= 4                          | 0.07        | 0.97        | 2.76               | 0.96               |

Area under the curve 0.71 (95%CI 0.64-0.79)



Supplemental Table S6 - Multivariate analysis of low-risk criteria including NT-proBNP and BNP (n=160).

| Low-Risk Criteria                           | Hazard Ratio | (95% CI)    | p     |
|---------------------------------------------|--------------|-------------|-------|
| NYHA I or II                                | 0.31         | (0.11-0.83) | 0.02  |
| 6MWD > 440 m                                | 0.71         | (0.19-2.67) | 0.617 |
| RAP < 8 mmHg                                | 0.63         | (0.30-1.32) | 0.224 |
| CI $\geq$ 2.5 L/m/m <sup>2</sup>            | 0.62         | (0.31-1.24) | 0.176 |
| NT-proBNP < 300 ng/L<br>OR<br>BNP < 50 ng/L | 1.13         | (0.37-3.42) | 0.828 |
